# Supplementary material for: Operation Moonshot: rapid translation of a SARS-CoV-2 targeted peptide immunoaffinity liquid chromatography-tandem mass spectrometry test from research into routine clinical use
Source: publisher site journal article supplement (doi:10.1515/cclm-2022-1000), 2022-11-17
Supplement: Supplementary file 1 [file j_cclm-2022-1000_suppl_001.docx]

**Supplementary material S1**

**Chemicals and reagents**

Synthetic peptides, ADETQALPQRK (ADE), AYNVTQAFGR, (AYN), DGIIWVATEGALN (DGI) and stable isotope labelled (SIL) peptides [U-13C6, 15N4-Arg] ADETQALPQRK (ADE), AYNVTQAFGR (AYN) and DGIIWVATEGALN (DGI) were obtained from Cambridge Research biochemicals (Cambridge, UK). High affinity anti-peptide rabbit monoclonal antibodies specific for the three target peptides of SARS-COV-2 nucleoprotein covalently coupled to magnetic beads were purchased from SISCAPA Assay Technologies (Washington DC, USA and Victoria BC, Canada)._Ammonium bicarbonate, *N*α-tosyl-L-lysine chloromethyl ketone hydrochloride (TLCK) >99.0% and 3-[(3-cholamidopropyl)dimethylammonio]-1-propansesulfonate hydrate (CHAPS) >98% were purchased from Merck (Dorset, UK). Optima™ LC/MS grade water, acetonitrile and formic acid (99.5%) were from Fisher Chemical, Thermo Fisher Scientific (Loughborough, UK). LC/MS grade HCl (32%) and Rectapur acetone GPR were obtained from VWR International Ltd (Lutterworth, UK). Sequencing grade, bovine pancreatic trypsin (>10,000 units/mg protein) and molecular biology grade phosphate buffered saline, pH 7.4, were sourced from Merck (Dorset, England). RapiGest SF was obtained from Waters (Altrincham, UK). Miraclean MSC-96000 swabs were sourced from Trafalgar Scientific (Leicester, UK). Ethanol storage solution was prepared from ethanol:200 mM ammonium bicarbonate, pH 8 (30:70 v;v). Human Rhinovirus 16-VPO (0.5mg/mL) was obtained from Indoor Biotechnologies (Cardiff, UK). Human Influenza IAV (Hong Kong/45/2019 H3N2) (0.48 mg/mL) and Influenza IVB (Victoria/35/2013 NA) (1.81 mg/mL) were obtained from Native Antigen Company (Oxford, UK). Synthetic saliva and deactivated virus were obtained from LGC (Middlesex, UK).

**Standards and Internal Quality Control**

Stock standards (100 fmol/µL) of each peptide were prepared by dilution of the individual 10 pmol/µL stocks in 5% acetonitrile, 0.1% formic acid. A mixed working standard solution of AYN and ADE peptides (1 fmol/µL) was prepared in 5% acetonitrile, 0.1% formic acid and used to prepare a set of calibrators at 0, 1.78. 3.55. 7.31 14.2, 28.4, 56.8 and 113.6 amol/µL, respectively. A working standard solution of DGI (1 fmol/µL) was prepared in 5% acetonitrile, 0.1% formic acid and used to prepare a set of calibrators at 0, 17.8. 35.5 73.1 142.0, 284, 568 and 1136 amol/µL respectively.

A mixed standard of the three SIL peptides was prepared by dilution of the individual 10 pmol/µL stocks in 30% acetonitrile, 0.1% formic acid. Working SIL mix (0.2 fmol/µL) was prepared by serial dilution of mixed SIL stock standard in 30% acetonitrile, 0.1% formic acid.

Two levels (negative and positive) of Internal Quality Control (IQC) material were prepared in-house. The negative IQC were replicate NP swabs collected into ethanol storage solution and stored at -80°C prior to analysis. The positive IQC material was a synthetic sample prepared ‘on swab’ from a solution of synthetic saliva spiked with deactivated virus and stored at -80°C prior to analysis.

Table S1: MRM transitions monitored for each peptide and corresponding stable isotope labelled (SIL) standard.

| Peptide | Transition | Collision energy | Quant/Qualifier |
| --- | --- | --- | --- |
| SARS_CoV_2_N_AYN y6 | 563.786 > 679.352 | 19 | Quantifier |
| SARS_CoV_2_N_AYN y8 | 563.786 > 892.464 | 19 | Qualifier 1 |
| SARS_CoV_2_N_AYN y5 | 563.786 > 578.305 | 19 | Qualifier 2 |
| SARS_CoV_2_N_AYN_IS_SIL y6 | 568.790 > 689.361 | 19 |  |
| SARS_CoV_2_N_AYN_IS_SIL y8 | 568.790 > 902.472 | 19 |  |
| SARS_CoV_2_N_AYN_IS_SIL y5 | 568.790 > 588.313 | 19 |  |
| SARS_CoV_2_N_ADE y3 | 564.786 > 400.230 | 19 | Quantifier |
| SARS_CoV_2_N_ADE y5 | 564.786 > 584.351 | 20 | Qualifier 1 |
| SARS_CoV_2_N_ADE y6 | 564.786 > 712.41 | 19 | Qualifier 2 |
| SARS_CoV_2_N_ADE_IS_SIL y3 | 569.790 > 410.239 | 19 |  |
| SARS_CoV_2_N_ADE_IS_SIL y5 | 569.790 > 594.360 | 20 |  |
| SARS_CoV_2_N_ADE_IS_SIL y6 | 569.790 > 722.418 | 19 |  |
| SARS_CoV_2_N_DGI_y10 | 842.949 > 1001.526 | 30 | Quantifier |
| SARS_CoV_2_N_DGI_y11 | 842.949 > 1100.595 | 30 | Qualifier 1 |
| SARS_CoV_2_N_DGI_y7 | 562.302 > 700.399 | 17 | Qualifier 2 |
| SARS_CoV_2_N_DGI_IS_SIL y10 | 846.956 > 1009.540 | 30 |  |
| SARS_CoV_2_N_DGI_IS_SIL y11 | 846.956 > 1108.649 | 30 |  |
| SARS_CoV_2_N_DGI_IS_SIL y7 | 564.973 > 708.413 | 17 |  |
