# Supplementary material for: Operation Moonshot: rapid translation of a SARS-CoV-2 targeted peptide immunoaffinity liquid chromatography-tandem mass spectrometry test from research into routine clinical use
Source: publisher site journal article supplement (doi:10.1515/cclm-2022-1000), 2022-11-17
Supplement: Supplementary file 2 [file j_cclm-2022-1000_suppl_002.docx]

**Supplementary material S2.**

**Method Validation criterion**

Synthetic peptide calibration curves, incorporating a zero and seven non-zero calibrators, were obtained by plotting analyte to stable isotope label (SIL) response ratios versus concentration using least squares regression with a weighting of 1/*x.*  Linearity was confirmed by replicate analysis of the curves in independent run over ten days with an R2 > 0.99 being considered acceptable.

The lower limit of quantification (LLOQ) was defined as the concentration at which the relative standard deviation (RSD) was ≤ 20%, the accuracy was ± 20% of the target value and signal:noise (S:N) > 10. The limit of detection (LOD) was determined by replicate analysis (n=3) of serial dilutions of the lowest calibration standard. The LOD was defined as the concentration at which S:N >10.

Injection reproducibility was determined by replicate analysis of a pooled, extracted patient sample (n=10) with acceptable reproducibility defined as RSD ≤ 5%. Intra-assay imprecision was determined by replicate analysis (n=5) of positive and negative IQC materials in a single analytical run. Inter-assay imprecision was determined by replicate analysis (n=5) of the same materials in five independent runs performed over nine days. The acceptance criterion for the negative control material was 100% correct classification (detected/not detected). The acceptance criterion for the positive control material was an RSD of ≤ 15%.

Carryover was assessed by injection of a solvent blank directly after injection of pooled SARS-CoV-2 positive extracted patient swabs. The peak area of the blank sample was required to be ≤ 20% of the peak area at the LLOQ.

Selectivity was evaluated by analysis of four nucleocapsid (NCAP) protein standard solutions (0, 125, 625 and 1250 amol/μL) spiked with varying concentrations of human Influenza A, B and Rhinovirus (whole virus) (0, 125, 625 and 1250 amol/μL). An acceptable response was defined as <20% of the analyte area at the LLOQ and/or < 5% of the area of the SIL. The reproducibility of ion ratios in true positive patient samples was determined (n=158).

The stability of extracted patient samples was determined by preparing eight patient pools (two SARS-CoV-2 negative, six SARS-CoV-2 positive) and storing at 10°C and -80°C for 24, 48 and 72 hours prior to analysis. In addition, for each storage temperature, one set of pooled samples were simply thawed and analysed and one set of pooled samples was thawed and reconstituted with 0.1 % formic acid (20 µL) prior to analysis. Stability of the analytes in the extracts was confirmed when accuracies were within ±15% of the values from the initial injection.

Method comparison was performed against RT-PCR (Thermofisher TaqPath™ COVID-19 CE-IVD RT-PCR kit, Cat A48067), which is accepted to be the gold standard method of analysis, or at least of detection. Three nasopharyngeal swabs from each subject (n=396) were collected under the umbrella of the FALCON study, the first two swabs were collected into viral transport medium (VTM) and the third swab into ethanol deactivation solution. Diagnostic sensitivity and specificity were used to assess agreement between the methods. The target performance criterion set by the DHSC was > 95% for sensitivity and specificity at RT-qPCR quantification cycle (Cq) < 27. Concordance between the two methods (Cohen’s Kappa > 0.8) [1] was a target set by the P2 laboratories.

A comparison of the RT-qPCR (Thermofisher TaqPath™ COVID-19) method performed in two different laboratories was undertaken to benchmark the error rate associated with independently collected samples from the same subject at the same time (n=502).

1. Landis J, Kock G. The measurement of observer agreement for categorical data. Biometrics 1977;35:159-74.
