# Supplementary material for: Operation Moonshot: rapid translation of a SARS-CoV-2 targeted peptide immunoaffinity liquid chromatography-tandem mass spectrometry test from research into routine clinical use
Source: publisher site journal article supplement (doi:10.1515/cclm-2022-1000), 2022-11-17
Supplement: Supplementary file 3 [file j_cclm-2022-1000_suppl_003.docx]

**Supplementary material S3.**

The method demonstrated good selectivity with no interference from Influenza A, B and Rhinovirus. The selectivity was evaluated by spiking a pool of SARS CoV-2 negative samples with four different levels of nucleocapsid (NCAP) protein (0, 10, 50 and 100 fmol on column), and spiking each NCAP level with four levels of Influenza A, B and Rhinovirus proteins (0, 10, 50 and 100 fmol on-column). The NCAP protein peptides AYN and ADE demonstrated coefficients of variation of 3 - 9% and 1 - 13% respectively.

Figure S3:Evaluation of the method’s selectivity for nucleocapsid (NCAP) protein in samples also containing Influenza A and B, and Rhinovirus. SARS CoV-2 negative samples were spiked with four levels of NCAP (0, 10, 50 and 100 fmol), and each NCAP level was spiked with increasing amounts of Influenza A and B, and Rhinovirus proteins (0, 10, 50 and 100 fmol). No effect on the signal from the NCAP peptides, ADE and AYN, could be detected with increasing amounts of the Influenza and Rhinoviruses.
